# Supplementary material for: Simultaneous fluoroimmunoassay of two tumor markers based on CdTe quantum dots and gold nanocluster coated-silica nanospheres as labels
Source: Royal Society of Chemistry journal article supplement (doi:10.1039/c5ra19262e), 2015-01-01
Supplement: c5ra19262e1.pdf [file c5ra19262e1.pdf]

## Electronic Supplementary Material

### **Simultaneous fluoroimmunoassay of two tumor markers based on CdTe quantum dots and gold nanoclusters coated-silica nanospheres as labels**

Lihua Li,<sup>a,b</sup> Dexiang Feng,<sup>a,b</sup> Junqing Zhao,<sup>a</sup> Zilin Guo<sup>a</sup> and Yuzhong Zhang<sup>\*a</sup>

a College of Chemistry and Materials Science, the Key Laboratory of Functional Molecular Solids, Ministry of Education, Anhui Laboratory of Molecule-Based Materials and Anhui Key Laboratory of Chemo-Biosensing, Anhui Normal University, Wuhu 241000, People's Republic of China

b Department of Pharmacy, Wannan Medical College, Wuhu 241002, People's Republic of China

\* Corresponding author. Tel: +86 553 3869303; Fax: +86 553 3869303

E-mail address: zhyz65@mail.ahnu.edu.cn (Y. Zhang).

## 1 Preparation of CdTe QDs

40  $\mu\text{L}$  Thioglycolic acid (TGA) was added to 100 mL nitrogen-saturated ultrapure water containing 0.0917 g  $\text{Cd}(\text{AC})_2 \cdot 2\text{H}_2\text{O}$ . After adjusting to pH 10 with 0.01 M NaOH, 0.2209 g trisodium citrate and 0.0185 g  $\text{Na}_2\text{TeO}_3$  were added. Then 0.01 g  $\text{NaBH}_4$  was injected and bubbled by  $\text{N}_2$  for 10 min. The finished CdTe precursor solution was transferred to a reaction kettle and kept at 120  $^\circ\text{C}$  for 5 min to form yellow CdTe QDs. The CdTe QDs were precipitated in acetone and centrifuged at 10,000 rpm for 5 min, then re-dissolved in ultrapure water. They were extremely stable at 4  $^\circ\text{C}$  for more than six months.

## 2 Preparation of Au NCs

Briefly, 5.0 mL of aqueous BSA solution (50.0 mg  $\text{mL}^{-1}$ , 37  $^\circ\text{C}$ ) was added to an equal volume of 10.0 mM  $\text{HAuCl}_4$  under vigorous stirring. After 2 min, 0.5 mL of NaOH solution (1.0 M) was introduced, and the mixture was incubated at 37  $^\circ\text{C}$  for 12 h. The color of the solution changed from light yellow to light brown, and then to deep brown. Finally, Au NCs solution was obtained and stored at 4  $^\circ\text{C}$  for use.

## References

- 1 Y. F. Wu, J. H. Huang, T. Y. Zhou, M. C. Rong, Y. Q. Jiang and X. Chen, *Analyst*, 2013, **138**, 5563.
- 2 X. Wang, P. T. Sheng, L. P. Zhou, X. Tong, L. Shi and Q. Y. Cai, *Biosens. Bioelectron.*, 2014, **60**, 52.

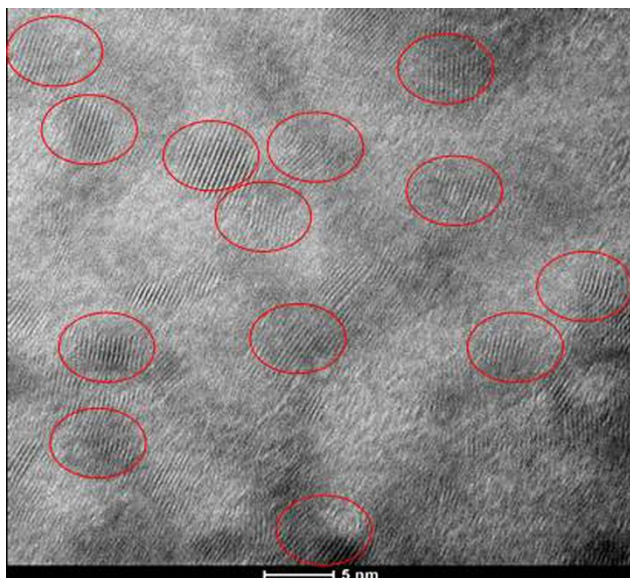

**Fig.S1** HRTEM images of CdTe QDs.

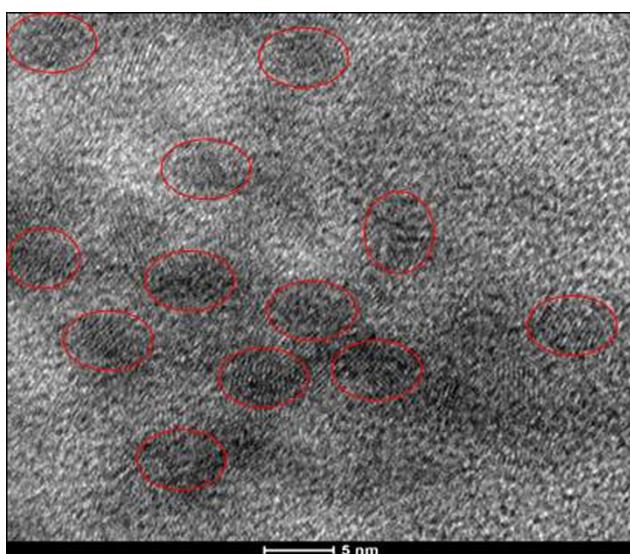

**Fig.S2** HRTEM images of Au NCs.
